# Supplementary material
Source: PubMed Central journal article supplement (PMC3012472)
Supplement: 1015340107_pnas.1015340107_SI.pdf [file 1015340107_pnas.1015340107_SI.pdf]

# Supporting Information

Mallamace et al. 10.1073/pnas.1015340107

**Table S1. Fitting parameters to the power-law and the Arrhenius equation of the viscosity data of 80 liquids; the melting ( $T_M$ ), glass transition temperature ( $T_g$ ), the references, and temperature range of the experimental data are also reported**

| System           | Full name                             | $T_M$ , K | $T_g$ , K | T range, K  | $\eta_0$ , P | $T_x$ , K | $\theta$ | $T_M/T_x$ | $T_x/T_g$ | $\ln(\eta_{0A})$ , P | $E/k_B$ , kK | Ref. $\eta$ |
|------------------|---------------------------------------|-----------|-----------|-------------|--------------|-----------|----------|-----------|-----------|----------------------|--------------|-------------|
| AC               | Acetic acid                           | 289.6     | 150       | 304–389     | 3.97E–03     | 177       | 1.856    | 1.64      | 1.18      |                      |              | (1)         |
| AMM              | Ammonia                               | 195       | 30        | 198–240     | 2.37E–03     | 122.55    | 1.655    | 1.59      | 4.09      |                      |              | (2)         |
| An               |                                       |           | 1,160     | 1,085–2,458 | 5.70E–02     | 1742      | 1.915    |           | 1.50      | –93.12               | 139.56       | (3)         |
| ANIL             | Aniline                               | 266.9     | 161       | 274–392     | 2.73E–03     | 235.66    | 1.960    | 1.13      | 1.46      |                      |              | (4, 5)      |
| ANOR             | Anorthite                             | 1,830     | 870       | 1,190–2,426 | 1.67E–01     | 1575      | 3.2      | 1.16      | 1.81      | –75.45               | 120.44       | (6)         |
| B2O3             | Boron Oxide                           | 723       | 541       | 536–1675    | 5.64E+01     | 702.7     | 2.900    | 1.03      | 1.30      | –53.16               | 45.60        | (7)         |
| BAS              | Basalt                                | 1,500     | 973       | 995–1918    | 2.27E+00     | 1,250     | 3.96     | 1.2       | 1.28      | –58.62               | 86.93        | (6)         |
| BEZ              | Benzene                               | 279       | 125       | 266–353     | 6.48E–03     | 145       | 2.130    | 1.92      | 1.16      | –5.30                | 1.40         | (8)         |
| BRP3             | 3-bromopentane                        | 146.9     | 108       | 107–127     | 4.60E–02     | 141       | 2.290    | 1.04      | 1.31      | –89.10               | 12.22        | (9)         |
| BSC              | Borosilicate Glass                    |           | 825       | 807–1611    | 1.21E+01     | 993       | 2.500    |           | 1.20      | –59.62               | 75.19        | (7)         |
| Ca1244           |                                       |           | 1,122     | 1,104–2,073 | 2.40E–01     | 1,300     | 3.260    |           | 1.16      | –144.98              | 199.42       | (3)         |
| Ca7611           |                                       |           | 1,199     | 1,153–2,458 | 4.36E–01     | 1,777     | 3.350    |           | 1.48      | –54.20               | 97.39        | (3)         |
| CaKNO3           | Ca-K-NO <sub>3</sub>                  |           | 333       | 354–473     | 6.08E–03     | 390       | 2.080    |           | 1.17      | –180.80              | 70.40        | (10)        |
| CDF              | 1-chloro-1,1-difluoroethane           | 142       | 27        | 143–264     | 8.29E–03     | 100.65    | 1.830    | 1.41      | 3.73      |                      |              | (2)         |
| CN60.0           | Soda lime Silicate G0                 |           | 1,030     | 1,012–1,810 | 6.30E–01     | 1,211     | 2.110    |           | 1.18      | –103.30              | 136.92       | (11)        |
| CN60.2           | Soda lime Silicate G2                 |           | 820       | 803–1653    | 1.67E+00     | 1,221     | 2.607    |           | 1.49      | –76.20               | 86.91        | (11)        |
| CN60.4           | Soda lime Silicate G4                 |           | 700       | 684–1563    | 5.40E+00     | 1,094     | 2.090    |           | 1.56      | –64.62               | 66.12        | (11)        |
| CTFM             | Chlorotrifluoromethane                | 91.2      | 18        | 92–191      | 9.00E–03     | 67.034    | 1.820    | 1.36      | 3.72      |                      |              | (2)         |
| CTTC             | Carbon tetrachloride                  | 250       | 60        | 273–373     | 4.86E–03     | 175       | 1.734    | 1.43      | 2.92      |                      |              | (1)         |
| Cum              | Isopropylbenzene                      | 177       | 124.8     | 136–304     | 5.07E–03     | 172       | 2.020    | 1.03      | 1.38      | –89.00               | 14.82        | (12)        |
| D20              | Deuterium oxide                       | 276.97    | 160       | 277–374     | 1.35E–03     | 238.14    | 1.480    | 1.16      | 1.49      |                      |              | (2)         |
| DBP              | Dibutyl phthalate                     | 238       | 170       | 180–330     | 7.30E–03     | 220       | 2.720    | 1.08      | 1.29      | –102.44              | 22.50        | (12)        |
| DCDFM            | Dichlorodifluoromethane               | 115.5     | 18        | 116–243     | 5.50E–03     | 101.66    | 1.660    | 1.14      | 5.65      |                      |              | (2)         |
| DEC              | Decane                                | 243.5     | 54        | 244–447     | 4.20E–03     | 175.477   | 1.830    | 1.39      | 3.25      |                      |              | (2)         |
| DFE              | 1,1-dichloro-1-fluoroethane           | 169.7     | 41        | 171–305     | 7.89E–03     | 123.9     | 1.930    | 1.37      | 3.02      |                      |              | (2)         |
| Di               |                                       |           | 1,005     | 962–2312    | 3.16E–01     | 1,248     | 2.999    |           | 1.24      | –112.34              | 141.78       | (3)         |
| DIOP             | Diopside                              | 1,664     | 990       | 959–2,065   | 2.6E–01      | 1,382     | 2.37     | 1.2       | 1.19      | –96.61               | 126.02       | (13, 14)    |
| DMP              | Dimethyl phthalate                    | 279       | 206       | 243–369     | 3.60E–03     | 249.75    | 2.23     | 1.12      | 1.21      | –41.77               | 11.09        | (15)        |
| DOD              | Dodecane                              | 263.5     | 76        | 264–489     | 4.20E–03     | 196       | 1.810    | 1.34      | 2.58      |                      |              | (2)         |
| ECT              | Ethane, 1-chloro-1,2,2,2-tetrafluoro- | 156       | 36        | 122–261     | 1.39E–02     | 93.39     | 2.220    | 1.67      | 2.59      |                      |              | (2)         |
| EDT              | Ethane, 2,2-dichloro-1,1,1-trifluoro- | 166       | 59        | 166–301     | 8.30E–03     | 120       | 1.870    | 1.38      | 2.03      |                      |              | (2)         |
| ETF              | Ethane, 1,1,1,2-tetrafluoro-          | 169.9     | 71        | 170–247     | 3.08E–03     | 131.2     | 1.568    | 1.29      | 1.85      |                      |              | (2)         |
| ETZ              | Ethyl benzene                         | 178.2     | 111.8     | 160–303     | 5.90E–03     | 149.22    | 2.02     | 1.19      | 1.33      |                      |              | (15)        |
| FM               | Fluoromethane                         | 131.4     |           | 177–195     | 4.60E–03     | 87.7      | 1.764    | 1.50      |           |                      |              | (2)         |
| GEO              | GeO <sub>2</sub>                      | 1,388     | 810       | 755–1,787   | 4.54E+01     | 1,255     | 2.99     | 1.1       | 1.55      | –11.98               | 34.49        | (3)         |
| Gly              | Glycerol                              | 291       | 190       | 192–343     | 6.70E–03     | 277       | 2.990    | 1.05      | 1.46      | –66.64               | 17.75        | (16)        |
| H <sub>2</sub> O | Water                                 | 273.15    | 160       | 243–340     | 1.37E–03     | 225       | 1.677    | 1.21      | 1.41      |                      |              | (17)        |
| HFFPA            | 1,1,1,2,2,3,3,3-heptafluoropropane    | 146       | 47        | 146–256     | 6.99E–03     | 68.133    | 2.300    | 2.14      | 1.45      |                      |              | (2)         |
| HFFPB            | 1,1,1,2,2,3,3-hexafluoropropane       | 179       | 95        | 243–279     | 2.90E–03     | 160       | 1.788    | 1.12      | 1.68      |                      |              | (2)         |
| HFPC             | 1,1,1,3,3,3-hexafluoropropane         | 179       | 98        | 180–271     | 2.82E–03     | 152.72    | 1.516    | 1.17      | 1.56      |                      |              | (2)         |
| HPT              | Heptane                               | 182.6     | 44        | 180–373     | 5.00E–03     | 138       | 1.809    | 1.32      | 3.14      |                      |              | (2)         |
| HXA              | Hexane                                | 178       | 23        | 175–341     | 5.60E–03     | 121.2     | 1.870    | 1.47      | 5.27      |                      |              | (2)         |
| ISB              | Isobutane                             | 113       | 20        | 116–261     | 1.13E–02     | 82.6      | 2.150    | 1.37      | 4.13      |                      |              | (2)         |
| METH             | Methanol                              | 175.3     | 100       | 178–337     | 1.05E–02     | 126       | 2.270    | 1.39      | 1.26      | –10.87               | 1.55         | (18)        |
| MTP2             | 2-methylpentane                       | 120       | 78        | 80.5–333    | 6.46E–03     | 112.26    | 1.716    | 1.07      | 1.44      | –65.37               | 7.80         | (2)         |
| NBB              | Butylbenzene                          | 185       | 125       | 136–304     | 5.22E–03     | 175       | 1.960    | 1.06      | 1.40      | –90.44               | 15.02        | (12)        |
| NBS 711          | NBS711 glass                          |           | 705       | 670–1,622   | 3.76E+01     | 881.3     | 2.230    |           | 1.25      | –42.57               | 51.75        | (7)         |
| NBS 710          | NBS710 glass                          |           | 830       | 827–1,776   | 5.84E+00     | 1,263     | 2.190    |           | 1.52      | –57.43               | 72.34        | (11)        |
| NON              | Nonane                                | 219.5     | 122       | 220–423     | 2.94E–03     | 189.7     | 1.417    | 1.16      | 1.55      |                      |              | (2)         |
| nPBZ             | n-propyl benzene                      | 173.7     | 124       | 151–303     | 4.30E–03     | 164       | 2.27     | 1.06      | 1.32      | –50.28               | 8.59         | (15)        |
| nProp            | Propanol                              | 147       | 96.2      | 103–368     | 9.00E–03     | 139       | 2.900    | 1.06      | 1.44      | –53.87               | 7.97         | (19)        |
| NS4              |                                       |           | 784       | 703–1,725   | 1.54E+01     | 1,154     | 2.998    |           | 1.47      | –53.01               | 62.56        | (3)         |
| NS66             |                                       |           | 726       | 719–1,805   | 3.86E+00     | 1,005     | 2.500    |           | 1.38      | –70.21               | 72.77        | (11)        |
| NS80             |                                       |           | 758       | 718–1,759   | 9.85E+00     | 1,209     | 2.770    |           | 1.59      | –49.51               | 39.90        | (11)        |
| OCT              | Octane                                | 216.3     | 54        | 216–398     | 4.04E–03     | 159.39    | 1.684    | 1.36      | 2.95      |                      |              | (2)         |
| OTP              | o-terphenyl                           | 328.5     | 246       | 239–383     | 3.00E–03     | 306       | 1.800    | 1.07      | 1.24      | –184.12              | 51.30        | (20, 21)    |
| PDE              | phenolphthalein dimethyl ether        | 373       | 294       | 296–511     | 1.79E–03     | 343.51    | 2.99     | 1.08      | 1.17      | –118.00              | 42.00        | (13)        |
| PEN              | Pentane                               | 143.4     | 52        | 143–309     | 4.30E–03     | 115.7     | 1.520    | 1.24      | 2.23      |                      |              | (2)         |
| PHN              | Phenol                                | 314.6     | 197.6     | 297–343     | 2.10E–03     | 236.39    | 2.78     | 1.33      | 1.20      |                      |              | (22)        |
| POC              | $\alpha$ -phenyl-o-cresol             | 323       | 220       | 207–285     | 1.38E–02     | 266       | 1.620    | 1.21      | 1.21      | –135.46              | 34.64        | (20)        |
| POLYS            | Polystyrene                           |           | 332       | 335–489     | 1.74E–03     | 375       | 2.999    |           | 1.05      | –165.40              | 63.50        | (23)        |

(continued)

Table S1. (Continued)

| System | Full name                             | T <sub>M</sub> , K | T <sub>g</sub> , K | T range, K | η <sub>0</sub> , P | T <sub>x</sub> , K | θ     | T <sub>M</sub> /T <sub>x</sub> | T <sub>x</sub> /T <sub>g</sub> | ln(η <sub>0A</sub> ), P | E/k <sub>B</sub> , kK | Ref. η |
|--------|---------------------------------------|--------------------|--------------------|------------|--------------------|--------------------|-------|--------------------------------|--------------------------------|-------------------------|-----------------------|--------|
| PPCA   | Propylene carbonate                   | 218                | 159.5              | 157–342    | 1.40E–02           | 161                | 2.070 | 1.35                           | 1.01                           | –161.19                 | 29.32                 | (1)    |
| PRPA   | Propane                               | 85.5               | 30                 | 86–280     | 6.30E–03           | 68                 | 1.800 | 1.26                           | 2.27                           |                         |                       | (2)    |
| PRPE   | Propene                               | 88                 | 29                 | 100–225    | 5.30E–03           | 78.47              | 1.613 | 1.12                           | 2.71                           |                         |                       | (2)    |
| PS1    | Ti-bearing Na silicate melt 1         |                    | 796                | 785–1,683  | 9.24E+00           | 1,162              | 2.150 |                                | 1.46                           | –40.06                  | 51.59                 | (24)   |
| PS2    | Ti-bearing Na silicate melt 2         |                    | 746                | 784–1,679  | 5.80E+00           | 1,206              | 2.050 |                                | 1.62                           | –42.65                  | 54.32                 | (24)   |
| PS3    | Ti-bearing Na silicate melt 3         |                    | 765                | 815–1,676  | 8.88E+00           | 1,210              | 2.320 |                                | 1.58                           | –42.21                  | 55.31                 | (24)   |
| PS4    | Ti-bearing Na silicate melt 4         |                    | 809                | 837–1,591  | 8.17E+00           | 1,208              | 2.050 |                                | 1.49                           | –45.22                  | 59.88                 | (24)   |
| PS5    | Ti-bearing Na silicate melt 5         |                    | 827                | 884–1,565  | 6.32E+00           | 1,220              | 2.200 |                                | 1.48                           | –54.57                  | 77.83                 | (24)   |
| PS6    | Ti-bearing Na silicate melt 6         |                    | 857                | 864–1,565  | 8.77E+00           | 1,206              | 2.130 |                                | 1.41                           | –48.96                  | 65.04                 | (24)   |
| Sal    | Salol                                 | 318                | 220                | 213–333    | 5.00E–03           | 262                | 1.350 | 1.21                           | 1.19                           | –129.50                 | 33.87                 | (20)   |
| SBB    | Sec-butylbenzene                      | 197.5              | 127                | 159–219    | 4.00E–03           | 162                | 2.770 | 1.22                           | 1.28                           | –40.70                  | 7.55                  | (12)   |
| SIO    | SiO <sub>2</sub>                      | 1,923              | 1,480              | 1276–2,517 | 5.40E+01           | 1,612              | 2.700 | 1.19                           | 1.09                           | –28.97                  | 86.19                 | (3)    |
| TANAB  | Tri-α-naphthylbenzene                 | 442                | 340                | 330–680    | 3.40E–03           | 424                | 2.170 | 1.04                           | 1.25                           | –126.20                 | 51.94                 | (20)   |
| tBT    | t-butanol                             | 298.82             |                    | 290–315    | 4.30E–04           | 248.85             | 2.85  | 1.2                            |                                |                         |                       | (22)   |
| TCFM   | Trichlorofluoromethane                | 162.5              | 40                 | 163–296    | 5.20E–03           | 136.4              | 1.588 | 1.19                           | 3.41                           |                         |                       | (2)    |
| TCTF   | 1,1,2-trichloro-1,2,2-trifluoroethane | 238                | 120                | 237–320    | 2.80E–03           | 191                | 1.437 | 1.25                           | 1.59                           |                         |                       | (2)    |
| Tol    | Toluene                               | 180                | 113                | 157–380    | 4.24E–03           | 161                | 1.720 | 1.12                           | 1.42                           | –10.08                  | 3.08                  | (12)   |
| TPE    | Triphenyl ethene                      | 341                | 248                | 253–570    | 3.40E–03           | 297                | 2.4   | 1.15                           | 1.20                           | –134.84                 | 40.83                 | (6)    |
| TPP    | Triphenyl phosphite                   | 295                | 200                | 208–424    | 3.30E–03           | 215                | 1.34  | 1.37                           | 1.08                           | –9.10                   | 1.39                  | (25)   |

- Lide DR (2003) *CRC Handbook of Chemistry and Physics* (CRC, Boca Raton, FL), 84th Ed.
- NIST Chemistry WebBook (2008) <http://webbook.nist.gov/chemistry/fluid/>.
- Sipp A, Bottinga Y, Richet P (2001) New high viscosity data for 3D network liquids and new correlations between old parameters. *J Non-Cryst Solids* 288:166–174.
- Bock E, Czubyrt J, Tomchuk E (1970) Proton spin-lattice relaxation time of aniline-d, in deuterated benzene and deuterated aniline solution. *Can J Chem* 48:2814–2818.
- Steiner LA (1938) Viscosity of aniline between 20° and 100° C. *Ind Eng Chem Anal* 10:582–584.
- Mauro JC, Yue Y, Ellison AJ, Gupta PK, Allan DC (2009) Viscosity of glass-forming liquids. *Proc Natl Acad Sci USA* 106:19780–19784.
- Twee H, Simmons JH, Macedo PB (1971) Application of the environmental application model to the temperature dependence of the viscosity. *J Chem Phys* 54:1952–1959.
- Hu PM, Parsons RW (1958) The viscosity and density of benzene near its freezing point. *Proc Phys Soc* 72:454–457.
- Wilson WL, Mellon PF, Berberian JG (1982) The steady-state shear viscosities of some bromopentanes. *J Chem Phys* 76:2602–2605.
- Weiler R, Blaser S, Macedo PB (1969) Viscosity of a vitreous potassium nitrate-calcium nitrate mixture. *J Phys Chem* 73:4147–4151.
- Neuville DR (2006) Viscosity, structure and mixing in (Ca, Na) silicate melts. *Chem Geo* 229:28–41.
- Rosler E (1990) Corresponding states analysis for viscosity and nuclear magnetic resonance data in the glass transition regime. *J Chem Phys* 92:3725–3735.
- Rha K (2007) Generalized excluded volume and the diffusivity and viscosity of supercooled liquids and glasses over the entire fragility spectrum. *Physica A* 378:167–182.
- Nascimento MLF, Ferreira EB, Zanotto ED (2004) Kinetics and mechanisms of crystal growth and diffusion in a glass-forming liquid. *J Chem Phys*. 121:8924–8928.
- Barlow AJ, Lamb J, Matheson AJ (1966) Viscous behaviour of supercooled liquids. *Proc R Soc London A* 292:322–342.
- Schroter K, Donth E (2000) Viscosity and shear response at the dynamic glass transition of glycerol. *J Chem Phys* 113:9101–9108.
- Cho CH, Urquidi J, Singh S, Wilse Robinson G (1999) Thermal offset viscosities of liquid H<sub>2</sub>O, D<sub>2</sub>O, and T<sub>2</sub>O. *J Phys Chem B* 103:1991–1994.
- Xiang HW, Laesecke A, Huber ML (2006) A new reference correlation for the viscosity of methanol. *J Phys Chem Ref Data* 35:1597–1620.
- Ling AC, Willard JE (1968) Viscosities of some organic glasses used as trapping matrices. *J Phys Chem* 72:1918–1923.
- Laughlin WT, Uhlmann DR (1972) Viscous flow in simple organic liquids. *J Phys Chem* 76:2317–2325.
- Rha K, Eu BC (2003) Theory of the viscosity of supercooled liquids and the glass transition: Fragile liquids. *Phys Rev E* 68:051204.
- Hughes JA, Byers CH (1986) Viscosity behavior in supercooled pure liquids and mixtures. ORNL/TM-9998, Oak Ridge National Laboratory, Oak Ridge, TN, December.
- Urakawa O, Swallen SF, Ediger MD, von Meerwall ED (2004) Self-diffusion and viscosity of low molecular weight polystyrene over a wide temperature range. *Macromolecules* 37:1558–1564.
- Liska M, Simurka P, Antalík J, Perichta P (1996) Viscosity of titania-bearing sodium silicate melts. *Chem Geo* 128:199–206.
- Zhao X, Kivelson D (1995) Light-scattering studies of simple molecular supercooled liquids: Structural considerations. *J Phys Chem* 99:6721–6732.

**Table S2. Fitting parameters to the power-law and the Arrhenius equation of the inverse of the self-diffusion coefficient data of 12 liquids; the melting ( $T_M$ ), glass transition temperature ( $T_g$ ), the references, and temperature range of the experimental data are also reported**

| System | Full name                       | $T_M$ , K | $T_g$ , K | T range, K  | $1/D_0$ , $m^{-2}s$ | $T_x$ , K | $\theta$ | $T_M/T_g$ | $T_x/T_g$ | $\ln(1/D_{0A})$ , $m^{-2}s$ | $E/k_B$ , kK | Ref. $D_s$ |
|--------|---------------------------------|-----------|-----------|-------------|---------------------|-----------|----------|-----------|-----------|-----------------------------|--------------|------------|
| CDE    | Cresolphthaleine dimethyl ether | 387       | 310       | 371–431     | 2.09E+08            | 377.4     | 2.622    | 1.03      | 1.22      | -36.74                      | 24.92        | (1)        |
| DIOP   | Diopside                        | 1,664     | 990       | 1,666–2,263 | 8.46E+07            | 1180      | 2.650    | 1.41      | 1.19      |                             |              | (2)        |
| Gly    | Glycerol                        | 291       | 190       | 256–459     | 7.29E+08            | 238.3     | 3.930    | 1.22      | 1.25      | 0.17                        | 8.09         | (1, 3)     |
| METH   | Methanol                        | 175.3     | 100       | 154–338     | 2.24E+08            | 172.3     | 2.290    | 1.02      | 1.72      | 11.37                       | 2.07         | (4, 5)     |
| OTP    | o-terphenyl                     | 328.5     | 246       | 246–344     | 7.93E+08            | 302       | 1.470    | 1.09      | 1.23      | -63.97                      | 26.77        | (6, 7)     |
| PDE    | phenolphthalein dimethyl ether  | 373       | 294       | 337–428     | 2.76E+08            | 362.96    | 2.380    | 1.03      | 1.23      | -21.87                      | 17.85        | (1, 8)     |
| POLYS  | Polystyrene                     |           | 332       | 335–581     | 1.62E+09            | 375       | 3.050    |           | 1.13      | -94.48                      | 47.37        | (9)        |
| PP6    | PEP-PDMS-6                      |           | 201       | 309–433     | 8.72E+9             | 260.53    | 4.000    |           | 1.30      |                             |              | (10)       |
| PPCA   | Propylene carbonate             | 218       | 159.5     | 179–332     | 1.33E+09            | 168       | 3.050    | 1.30      | 1.05      | -13.64                      | 8.11         | (11)       |
| Sal    | Salol                           | 318       | 220       | 249–369     | 2.16E+08            | 276       | 1.860    | 1.15      | 1.25      | -102.50                     | 33.67        | (1)        |
| TANAB  | Tri- $\alpha$ -naphthylbenzene  | 442       | 340       | 343–476     | 3.37E+08            | 424.9     | 2.120    | 1.04      | 1.25      | -80.60                      | 43.21        | (12)       |
| Tol    | Toluene                         | 180       | 113       | 135–378     | 3.41E+08            | 160.4     | 1.890    | 1.12      | 1.42      | -23.65                      | 7.53         | (13)       |

- Chang I, Sillescu H (1997) Heterogeneity at the glass transition: Translational and rotational self-diffusion. *J Phys Chem B* 101:8794–8801.
- Nascimento MLF, Ferreira EB, Zanotto ED (2004) Kinetics and mechanisms of crystal growth and diffusion in a glass-forming liquid. *J Chem Phys* 121:8924–8928.
- Chen B, Sigmund EE, Halperin WP (2006) Stokes-Einstein relation in supercooled aqueous solutions of glycerol. *Phys Rev Lett* 96:145502.
- Karger N, Vardag T, Ludemann H-D (1990) Temperature dependence of self-diffusion in compressed monohydric alcohols. *J Chem Phys* 93:3437–3444.
- Rathbun RE, Babb AL (1961) Self-diffusion in liquids III temperature dependence in pure liquids. *J Phys Chem* 65:1072–1074.
- Rha K, Eu BC (2003) Theory of the viscosity of supercooled liquids and the glass transition: Fragile liquids. *Phys Rev E* 68:051204.
- Mapes MK, Swallen SF, Ediger MD (2006) Self-diffusion of supercooled o-terphenyl near the glass transition temperature. *J Phys Chem B* 110:507–511.
- Rha K (2007) Generalized excluded volume and the diffusivity and viscosity of supercooled liquids and glasses over the entire fragility spectrum. *Physica A* 378:167–182.
- Urakawa O, Swallen SF, Ediger MD, von Meerwall ED (2004) Self-diffusion and viscosity of low molecular weight polystyrene over a wide temperature range. *Macromolecules* 37:1558–1564.
- Fleischer G, Rittig F, Stepanek P, Almdal K, Papadakis CM (1999) Self-diffusion of a symmetric PEP-PDMS diblock copolymer above and below the disorder-to-order transition. *Macromolecules* 32:1956–1961.
- Qi F, et al. (2000) Structural relaxation of the fragile glass-former propylene carbonate studied by nuclear magnetic resonance. *J Chem Phys* 112:9455–9462.
- Swallen SF, Bonvallet PA, McMahon RJ, Ediger MD (2003) Self-diffusion of tris-naphthylbenzene near the glass transition temperature. *Phys Rev Lett* 90:015901.
- NaNagara B, O'Conner RD, Blum FD (1992) Mobility of toluene in polystyrene-toluene solutions. A NMR Study. *J Phys Chem* 96:6417–6423.

**Table S3. Fitting parameters to the power-law and the Arrhenius equation of the relaxation time data of 8 liquids; the melting ( $T_M$ ), glass transition temperature ( $T_g$ ), the references, and temperature range of the experimental data are also reported**

| System | Full name                     | $T_M$ , K | $T_g$ , K | T range, K | $\tau_0$ , s | $T_x$ , K | $\theta$ | $T_M/T_x$ | $T_x/T_g$ | $\ln(\tau_{0A})$ , s | $E/k_B$ , kK | Ref. $\tau$ |
|--------|-------------------------------|-----------|-----------|------------|--------------|-----------|----------|-----------|-----------|----------------------|--------------|-------------|
| BPH    | Benzophenone                  | 321       | 208       | 200–434    | 7.65E–12     | 255.6     | 1.960    | 1.26      | 1.23      | -139.45              | 29.71        | (1)         |
| BRP3   | 3-bromopentane                | 146.9     | 108       | 111–298    | 1.70E–11     | 140       | 2.300    | 1.05      | 1.30      | -91.79               | 10.65        | (2)         |
| CaKNO3 | Ca-K-NO <sub>3</sub>          |           | 333       | 341–468    | 2.68E–12     | 391.7     | 2.378    |           | 1.18      | -196.24              | 69.00        | (3)         |
| Gly    | Glycerol                      | 291       | 190       | 221–270    | 1.16E–10     | 231.4     | 2.999    | 1.26      | 1.22      | -69.25               | 13.30        | (4)         |
| KDE    | cresolphthalein-dimethylether | 383       | 312       | 308–500    | 1.29E–11     | 375       | 2.650    | 1.02      | 1.20      | -126.55              | 40.76        | (5)         |
| OTP    | o-terphenyl                   | 328.5     | 246       | 248–311    | 9.77E–12     | 291.3     | 1.650    | 1.13      | 1.18      | -135.42              | 33.94        | (5)         |
| PPCA   | Propylene carbonate           | 218       | 159.5     | 162–310    | 8.39E–12     | 188.9     | 2.700    | 1.15      | 1.18      | -137.99              | 22.46        | (5)         |
| Sal    | Salol                         | 318       | 220       | 219–383    | 1.11E–11     | 263       | 1.817    | 1.21      | 1.20      | -116.40              | 25.80        | (6)         |

- Lunkenheimer P, Pardo LC, Kohler M, Loidl, A. (2008) Broadband dielectric spectroscopy on benzophenone:  $\alpha$  relaxation,  $\beta$  relaxation, and mode coupling theory. *Phys Rev E* 77:031506.
- Richert T, Angell CA (1998) Dynamics of glass-forming liquids. V. On the link between molecular dynamics and configurational entropy. *J Chem Phys* 108:9016–9026.
- Yang Y, Nelson KA (1996) Impulsive stimulated thermal scattering study of a relaxation dynamics and the Debye-Waller factor anomaly in Ca<sub>0.4</sub>K<sub>0.6</sub>(NO<sub>3</sub>)<sub>1.4</sub>. *J Chem Phys* 104:5429–5436.
- Paolucci DM, Nelson KA (2000) Impulsive stimulated thermal scattering study of structural relaxation in supercooled glycerol. *J Chem Phys* 112:6725–6732.
- Paluch M, Ngai KL, Hensel-Bielowka S (2001) Pressure and temperature dependences of the relaxation dynamics of cresolphthalein-dimethylether: Evidence of contributions from thermodynamics and molecular interactions. *J Chem Phys* 114:10872–10883.
- Yang Y, Nelson KA (1995) Impulsive stimulated light scattered from glass-forming liquids. II. Salol relaxation dynamics, nonergodicity parameter, and testing of mode coupling theory. *J Chem Phys* 103:7732–7739.
